# Supplementary material for: Functional Characterization of Lobularia maritima LmTrxh2 Gene Involved in Cold Tolerance in Tobacco through Alleviation of ROS Damage to the Plasma Membrane
Source: MDPI journal article supplement (doi:10.3390/ijms24033030), 2023-02-03
Supplement: s1 [file s1]

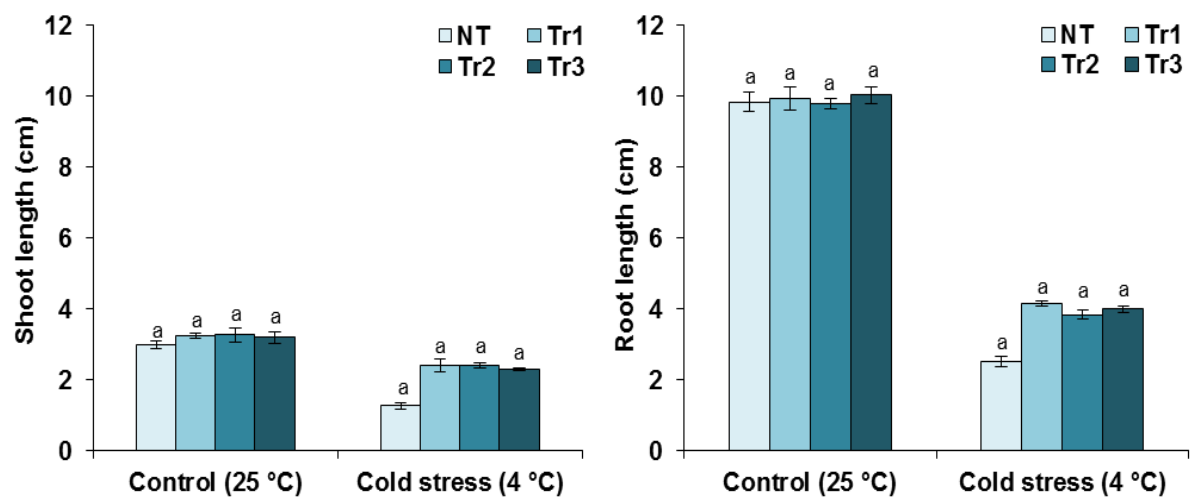

**Figure S1.** Effect of cold stress on shoot and root elongation of NT and *LmTrxh2*-transgenic tobacco seedlings. Data are expressed as the mean  $\pm$  SEM (n =3). Different lowercases indicate significant difference at  $P < 0.05$ .

**Table S1.** Sequences of primers used in PCR and RT-qPCR analysis.

| Primers            | Sequences                     |
|--------------------|-------------------------------|
| <i>qLmTrxh2-F</i>  | 5'-TGCTGGTGGTGGATTTTAGC-3'    |
| <i>qLmTrxh2-R</i>  | 5'-CAAAATCCGGCAGTTCATC-3'     |
| <i>qUBQ-10 -F</i>  | 5'-GAATACCTCCTTGTCTGGATCT-3'  |
| <i>qUBQ-10-R</i>   | 5'-GTACTTTGGCGGATTACAACATC-3' |
| <i>qACT-F</i>      | 5'-GTGCCCATTACGAACGATA-3'     |
| <i>qACT-R</i>      | 5'-GAAGACTCCATGCCGATCAT-3'    |
| <i>qNtSOD-F</i>    | 5'-ATTACCGACAAGCAGATTCCTC-3'  |
| <i>qNtSOD-R</i>    | 5'-CAACCCTTCCACCAGCATTTC-3'   |
| <i>qNtCAT1-F</i>   | 5'-TGGATCTCATACTGGTCTCA-3'    |
| <i>qNtCAT1-R</i>   | 5'-TTCCATTGTTTCAGTCATTCA-3'   |
| <i>qNtERD10C-F</i> | 5'-CATGATGACCTGGCAACTTC-3'    |
| <i>qNtERD10C-R</i> | 5'-AGCTCTAGCTCGGAGGATGA-3'    |
| <i>qNtLEA5-F</i>   | 5'-CTCTAACTCCAACTCATCTCT-3'   |
| <i>qNtLEA5-R</i>   | 5'-CAAAACCCCAGATTCAAGAC-3'    |
| <i>qNtDREB1A-F</i> | 5'-ACTGGACGTCCTGAGTGACA-3'    |
| <i>qNtDREB1A-R</i> | 5'-GGCATCGGAAGCCAGAAAAG-3'    |
| <i>qNtCOR15A-F</i> | 5'-GTCGTCGTTTCTCAACGCAAGA-3'  |
| <i>qNtCOR15A-R</i> | 5'-GCTTTCTCAGCTTCTTTACCCA-3'  |
| <i>qNtCOR47-F</i>  | 5'-TGTCATCGAAAAGCTTCACCGA-3'  |
| <i>qNtCOR47-R</i>  | 5'-ACCGGGATGGTAGTGGAAGT-3'    |
| <i>qNtKIN1-F</i>   | 5'-ATGCCTTCCAAGCCGGTCAGAC-3'  |
| <i>qNtKIN1-R</i>   | 5'-CCGGTCTTGTCTTCACGAAGT-3'   |
